# Supplementary material
Source: PubMed Central journal article supplement (PMC3408192)
Supplement: supp_M112.372151_jbc.M112.372151-1.pdf [file supp_M112.372151_jbc.M112.372151-1.pdf]

**Supplemental data for**

Kinetic partitioning between synthetic and editing pathways in class I aminoacyl-tRNA synthetases occurs at both pre-transfer and post-transfer hydrolytic steps

**Nevena Cvetesic<sup>1</sup>, John J. Perona<sup>2,3</sup> and Ita Gruic-Sovulj<sup>1,\*</sup>**

From the <sup>1</sup>Department of Chemistry, Faculty of Science, University of Zagreb,  
Horvatovac 102a, 10000 Zagreb, Croatia

<sup>2</sup>Department of Chemistry, Portland State University, PO BOX 751, Portland OR 97207, and

<sup>3</sup>Department of Biochemistry and Molecular Biology, Oregon Health and Sciences University, 3181  
SW Sam Jackson Park Road, Portland, OR 97239

## SUPPLEMENTAL EXPERIMENTAL PROCEDURES

### *Additional purification step for enzymes used in single-turnover kinetics and preparative misacylation reactions*

Control reactions to assess whether purified WT and mutant *E.coli* LeuRS contain bound Leu-AMP were performed by mixing 1  $\mu$ M [ $^{32}$ P]-tRNA<sup>Leu</sup> with 10  $\mu$ M WT LeuRS in 100 mM Tris-Cl (pH 7.5), 10 mM MgCl<sub>2</sub>, 150 mM KCl, 1 mM DTT and 10  $\mu$ g/ml BSA in the absence of both ATP and leucine. Reaction aliquots were quenched in a mixture of NaOAc (pH 4.5, 0.8 M final concentration) and SDS (final w/v of 0.1%) followed by tRNA hydrolysis using P1 nuclease (final concentration 0.1 mg/ml). TLC analysis was performed as described previously (1, 2; see Supplemental Fig. 1A).

Removal of Leu-AMP from purified LeuRS was accomplished by incubating enzyme preparations with tRNA<sup>Leu</sup> (molar ratio 2:1) in 100 mM Tris-Cl (pH 7.5), 10 mM MgCl<sub>2</sub>, 150 mM KCl, 1 mM DTT and 10  $\mu$ g/ml BSA for 15 min at 37 °C, thus allowing formation of Leu-tRNA<sup>Leu</sup> with release of AMP. To separate the aminoacylated tRNA from LeuRS, the reaction mixture was first incubated in a solution containing 2 M urea and 1 M NaCl for 1 h on ice. Subsequently, LeuRS was repurified from the mixture in the presence of 2 M urea and 1 M NaCl by binding and elution from Ni<sup>2+</sup>-NTA resin, and then dialyzed extensively against 20 mM Tris-Cl (pH 7.5), 50 mM NaCl and 10% glycerol prior to storage at -80 °C. Removal of tRNA was assessed by measuring the A<sub>260</sub>/A<sub>280</sub> ratio of the purified enzyme. Control reactions in single-turnover conditions performed with LeuRS purified in this manner, revealed less than 1% Leu- $^{32}$ P]-tRNA<sup>Leu</sup> formation in the absence of amino acid and ATP (see Supplemental Fig. 1B).

It must be noted that comparisons of steady-state activities show that EcLeuRS variants lose approximately 25% of their activities during this procedure. However, this is not a concern because the purified variant is necessary only in reactions in which the enzyme concentration is comparable or higher than tRNA concentration. All single-turnover reactions were performed under conditions of enzyme saturation in which the lower activity of purified variants had no effect on the reaction rate ( $k_{\text{trans}}$  for leucine was the same with purified and unpurified variants).

Supplemental Figure 1.

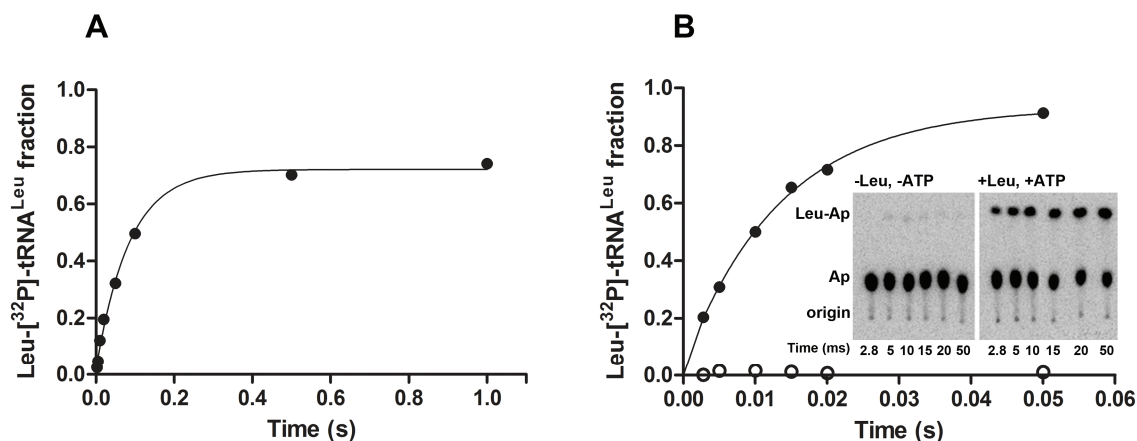

Copurification of *EcLeuRS* with Leu-AMP. *A*, Leu-[<sup>32</sup>P]-tRNA<sup>Leu</sup> formation by 10 μM WT LeuRS in the presence of 1 μM [<sup>32</sup>P]-tRNA<sup>Leu</sup> and absence of leucine and ATP in the reaction mixture. The high plateau of Leu-tRNA<sup>Leu</sup> formation under these conditions demonstrates that LeuRS copurifies with Leu-AMP. *B*, control transfer reactions performed with 1 μM [<sup>32</sup>P]-tRNA<sup>Leu</sup> and 10 μM WT LeuRS from which endogenous Leu-AMP was removed, in the presence (●) or absence (○) of saturating concentrations of leucine and ATP in the reaction mixture. The inset shows thin layer chromatograms that correspond to reaction progress curves illustrated on the graph. Leu-Ap indicates the position where leucylated A76 nucleotide migrates, while Ap indicates the position where the non-aminoacylated 3'-terminal monophosphorylated A76 nucleotide migrates. LeuRS from which Leu-AMP has been removed forms almost no detectable Leu-tRNA<sup>Leu</sup> in reactions without ATP and leucine, demonstrating that our purification procedure yields LeuRS essentially free of Leu-AMP. Additionally, the same  $k_{\text{trans}}$  for leucine transfer to tRNA<sup>Leu</sup> was obtained with both purified and unpurified LeuRS variants in single-turnover aminoacyl transfer reactions.

Supplemental Figure 2.

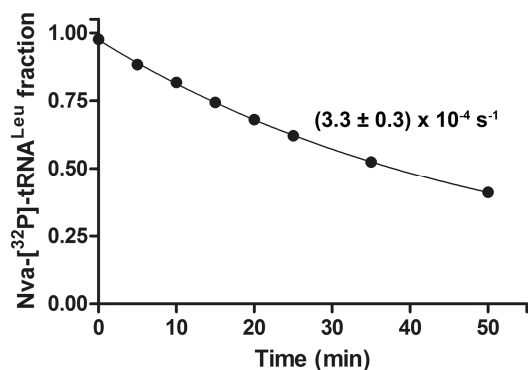

Nonenzymatic deacylation of Nva-[<sup>32</sup>P]-tRNA<sup>Leu</sup>. The fraction of Nva-[<sup>32</sup>P]-tRNA<sup>Leu</sup> (●) remaining in solution was plotted as a function of time. A fit to a first-order exponential equation provided a rate constant of  $3.3 \times 10^{-4} \text{ s}^{-1}$ . Rates of nonenzymatic aa-tRNA<sup>Leu</sup> hydrolysis used for correction of enzyme-catalyzed deacylation rates (see Table 2) were obtained under the same conditions and the same time frame as the enzyme-catalyzed reaction (from 3 to 12 minutes). These reaction times were chosen to satisfy steady-state conditions for enzymatic hydrolysis of aa-tRNA<sup>Leu</sup>. On this shorter time scale, the rate of nonenzymatic hydrolysis was apparently constant ( $1.9 \text{ nM s}^{-1}$ ), while on a longer time scale exponential decay with a rate constant of  $3.3 \times 10^{-4} \text{ s}^{-1}$  was observed.

Supplemental Figure 3.

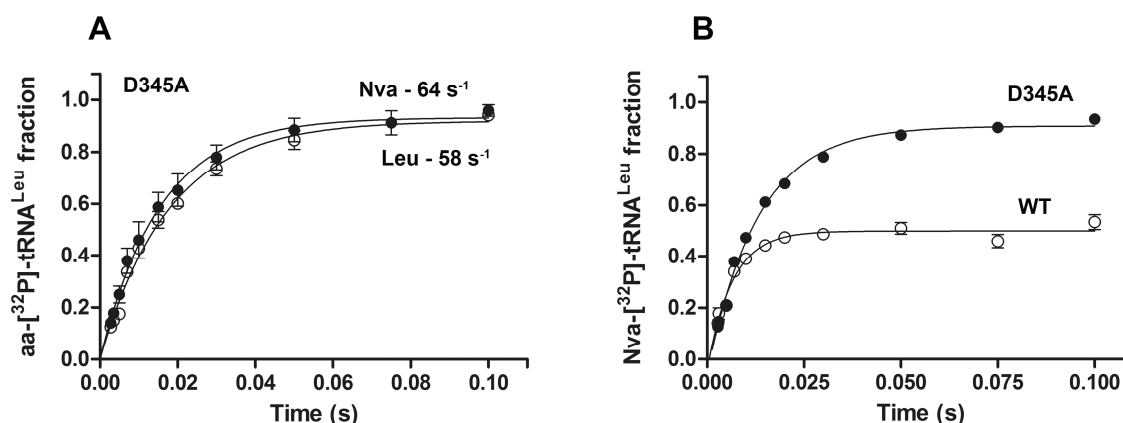

A) Single-turnover transfer of norvaline (●) or leucine (○) by D345A *EcLeuRS*.  
 B) Accumulation of Nva-tRNA<sup>Leu</sup> under rapid chemical quench conditions by WT (○) and D345A (●) LeuRS enzymes. Reaction conditions are the same as used for determination of the transfer step (see Experimental Procedures: Single-turnover transfer step). In both cases, tRNA<sup>Leu</sup> was present at 1 μM concentration, and LeuRS:aa-AMP (formed *in situ*) was present at 10 μM concentration. WT LeuRS displays plateau formation of Nva-tRNA<sup>Leu</sup>, because the reaction conditions used (saturating concentrations of ATP and Nva) enable multiple turnovers by rapid reformation of Nva-AMP, and regeneration of tRNA<sup>Leu</sup> through deacylation in the CP1 editing site. In contrast, when single-turnover conditions are applied (ensured by the limiting amounts of ATP), Nva-tRNA<sup>Leu</sup> formation and deacylation is observed as shown for T252R LeuRS (Fig. 6).

**Supplemental Table 1.** Nonenzymatic aa-AMP hydrolysis

| <b>aa-AMP</b>        | <b><math>k_{\text{obs}}</math></b> |
|----------------------|------------------------------------|
|                      | $\text{s}^{-1}$                    |
| Nva-AMP <sup>a</sup> | $(14 \pm 3) \times 10^{-4}$        |
| Leu-AMP <sup>b</sup> | $(17 \pm 9) \times 10^{-4}$        |

The values represent the best fit value  $\pm$  s.e.m. of <sup>a</sup>4 or <sup>b</sup>2 independent experiments.

**Supplemental Table 2.** Steady-state parameters for Nva-AMP formation<sup>a</sup>

| <i>EcLeuRS</i> | -tRNA       |                 |                                  | + tRNA            |                 |                                  |
|----------------|-------------|-----------------|----------------------------------|-------------------|-----------------|----------------------------------|
|                | $K_m$ (Nva) | $k_{cat}$       | $k_{cat}/K_m$                    | $K_m$ (Nva)       | $k_{cat}$       | $k_{cat}/K_m$                    |
|                | mM          | s <sup>-1</sup> | mM <sup>-1</sup> s <sup>-1</sup> | mM                | s <sup>-1</sup> | mM <sup>-1</sup> s <sup>-1</sup> |
| WT             | 3.8 ± 0.9   | 0.052 ± 0.003   | 0.014                            | n.d. <sup>b</sup> | n.d.            | n.d.                             |
| D345A          | 4 ± 1       | 0.043 ± 0.004   | 0.011                            | 7 ± 2             | 0.050 ± 0.003   | 0.007                            |
| T252R/D345A    | 4.3 ± 0.7   | 0.062 ± 0.003   | 0.014                            | 4.7 ± 0.7         | 0.061 ± 0.004   | 0.013                            |

<sup>a</sup> Measured by aminoacyl-adenylate synthesis assay.

The values represent the best fit value ± s.e.m. of three independent experiments.

The enzymes were assayed at 0.5 μM concentration and norvaline concentration was varied over the range 0.1-10 times the  $K_m$ .

<sup>b</sup> n.d. – not determined due to activity too low for reliable detection.

**SUPPLEMENTAL REFERENCES**

1. Gruic-Sovulj, I., Uter, N., Bullock, T., and Perona, J. J. (2005) tRNA-dependent aminoacyl-adenylate hydrolysis by a nonediting class I aminoacyl-tRNA synthetase. *J. Biol. Chem.* **280**, 23978-23986
2. Dulic, M., Cveticic, N., Perona, J. J., and Gruic-Sovulj, I. (2010) Partitioning of tRNA-dependent editing between pre- and post-transfer pathways in class I aminoacyl-tRNA synthetases. *J. Biol. Chem.* **285**, 23799-23809
